# Supplementary material for: Proteolipid protein–deficient myelin promotes axonal mitochondrial dysfunction via altered metabolic coupling
Source: PubMed Central journal article supplement — J Cell Biol. 2016 Nov 21;215(4):531–42. doi: 10.1083/jcb.201607099 (PMC5119941; doi:10.1083/jcb.201607099), 2016-11-21
Supplement: JCB_201607099_sm.pdf [file JCB_201607099_sm.pdf]

Yin et al., <https://doi.org/10.1083/jcb.201607099>

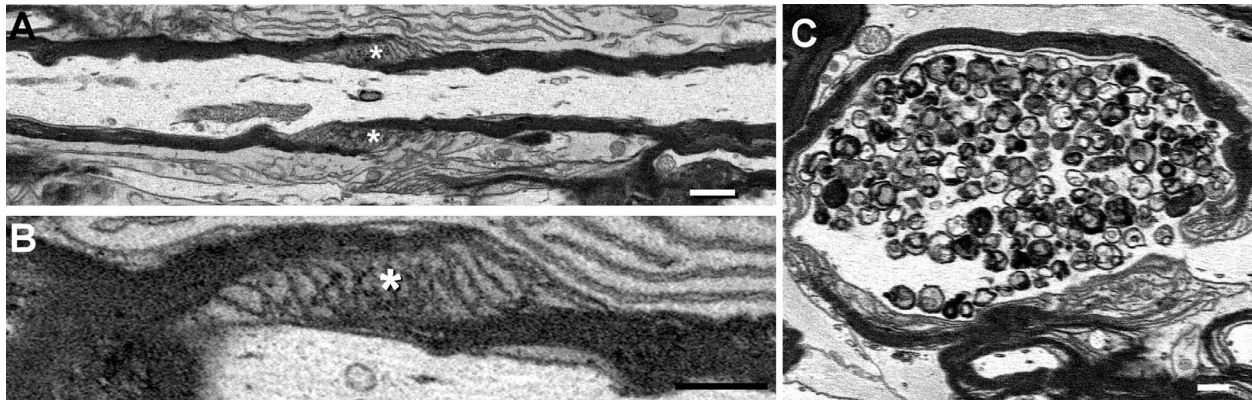

Figure S1. **Electron micrographs of optic nerve axons from 1- and 6-mo-old P<sub>0</sub>-CNS mice.** (A and B) SLIs were not sites of intraaxonal organelle accumulation in optic nerves from 1-mo-old P<sub>0</sub>-CNS mice. (B) Higher magnification confirms that this is an incisure, rather than paranodal membranes. (C) In axons from 6-mo-old P<sub>0</sub>-CNS optic nerves, accumulations of mitochondria, dense bodies, and vesicles were common, in contrast to 1-mo-old P<sub>0</sub>-CNS optic nerves (Fig. 2 B). Bars: (A) 0.5 μm; (B and C) 0.2 μm.

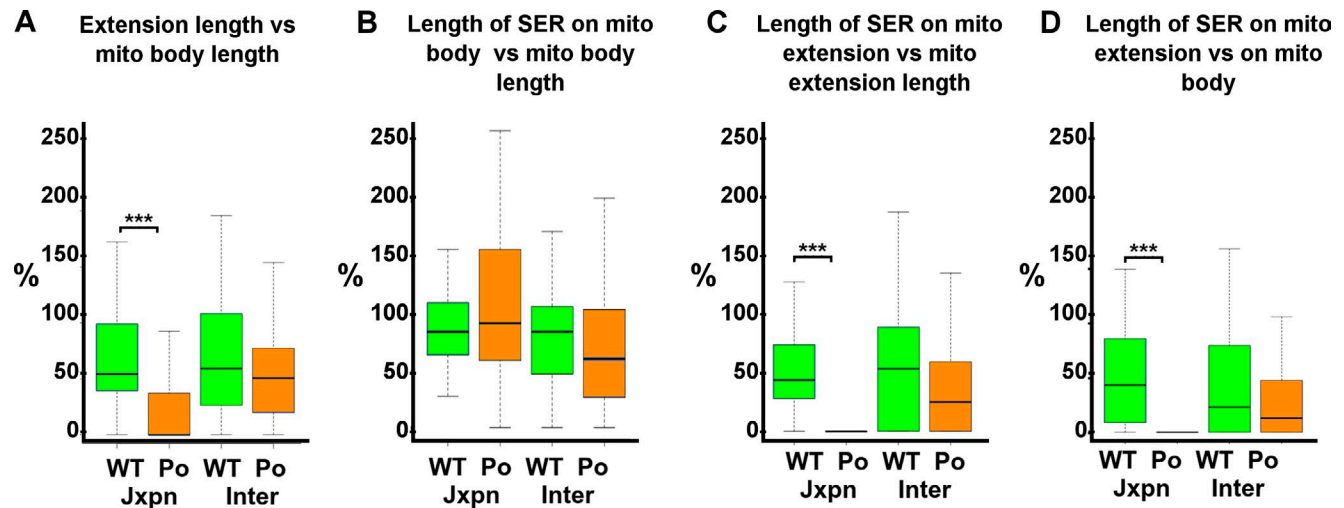

Figure S2. **Mitochondrial outer membrane extensions increase mitochondria–SER associations in optic nerve axons from 1-mo-old mice.** Relative lengths of extensions (A) and mitochondrial outer membrane–SER associations (B–D) expressed as a percentage of the length of the main mitochondrial body (A and B) and extension lengths (C). The contribution of SER on extensions to total SER length is shown as a percentage (D). Data and statistics are from Fig. 3 (N–Q). Box plots: bar, median; box, 25–75%; whiskers, 2.5–97.5%. \*\*\*,  $P < 0.005$ , Wilcoxon signed-rank test with Bonferroni correction; mitochondria pooled from three animals.  $n = 28, 42, 63,$  and  $62$ .

Table S1. **Percentage of mitochondria with normal and pathological morphologies (Fig. 2, E–I) bearing outer membrane extensions**

| Location                       | Elongated       | Round, normal                  | Round, few/absent cristae | No extensions     |
|--------------------------------|-----------------|--------------------------------|---------------------------|-------------------|
|                                | %               | %                              | %                         | %                 |
| WT Jxpn                        | 79.5 ± 2.3 (58) | 42.5 ± 5.2 (7)                 | 11.1 ± 13 (1.2)           | 33.8              |
| P <sub>0</sub> -CNS Jxpn       | 79.3 ± 6.2 (17) | 12.6 ± 9.5 <sup>a</sup> (5.6)  | 10.7 ± 6.1 (3.6)          | 73.8 <sup>a</sup> |
| WT Internodal                  | 89.5 ± 4.4 (62) | 63.1 ± 4.3 (14)                | 15.0 ± 6.7 (1.3)          | 22.7              |
| P <sub>0</sub> -CNS Internodal | 67.8 ± 7.7 (36) | 23.7 ± 18.3 <sup>a</sup> (7.5) | 7.0 ± 4.0 (1.1)           | 55.4 <sup>a</sup> |

Numbers in parentheses indicate the proportion of total mitochondria in each category (from Fig. 2 I).  $n = 3$  animals in each; total mitochondria, 1,528.  
<sup>a</sup> $P < 0.05$ ; P<sub>0</sub>-CNS versus WT; *t* tests.
